# Supplementary material for: Modeling paraquat-induced lung fibrosis in C. elegans reveals KRIT1 as a key regulator of collagen gene transcription
Source: publisher site journal article supplement (doi:10.18632/aging.202406), 2021-01-20
Supplement: Supplementary file [file aging-v13i3-202406-supplementary-material-SD2.pdf]

**SUPPLEMENTARY FIGURES**

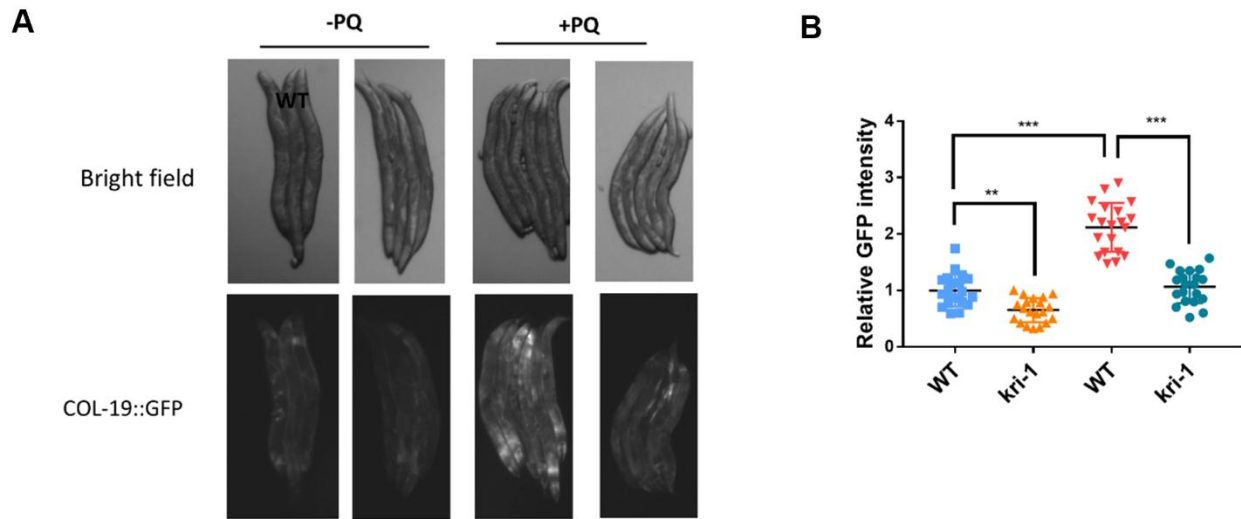

**Supplementary Figure 1. COL-19::GFP expression at day-4 of adulthood.** (A) Collagen fusion protein COL-19::GFP was increased by paraquat in a KRI-1 dependent manner. Wild type (WT) and *kri-1(ok1251)* mutant *C. elegans* expressing COL-19::GFP fusion protein were treated with 75  $\mu$ M paraquat (PQ) from L1 to day-4 adulthood. Animals were imaged with fluorescence microscope. Shown are representative images from 2 experiments. (B) Quantification of GFP intensity in individual worms. 20 worms were selected from 2 independent experiments and quantified through ImageJ software. Data were normalized to the average of WT non-treated control. Error bars show the standard deviation of 20 worms. P values were obtained from two tailed, unpaired student's t-test (\*\*,  $P < 0.01$ , \*\*\*,  $P < 0.001$ ).

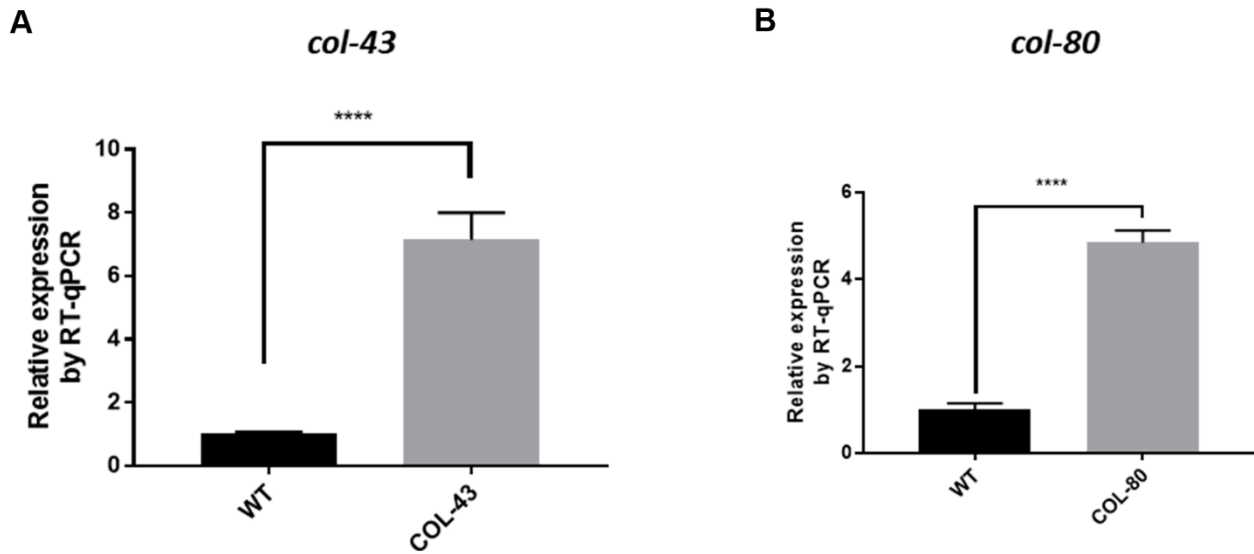

**Supplementary Figure 2. Confirmation of COL-43 and COL-80 overexpression in transgenic lines.** N2 wild-type (WT) *C. elegans* and strains expressing COL-43 (A) or COL-80 (B) were synchronized at L1 stage by hatching eggs in M9 buffer. Synchronized L1 animals were raised on standard NGM agar plate seeded with OP-50 from L1 to day-1 adulthood. Total RNA from day-1 adult worms was prepared for RT-qPCR analysis with primers for *col-43* and *col-80*. Data are the relative expression of *col-43* and *col-80* normalized to control RNAi and no drug control. Primers for actin gene was used as internal control. Error bars show the standard deviation of 4 replicates. P values were obtained from two tailed, unpaired student's t-test (\*\*\*\*,  $P < 0.00001$ ).

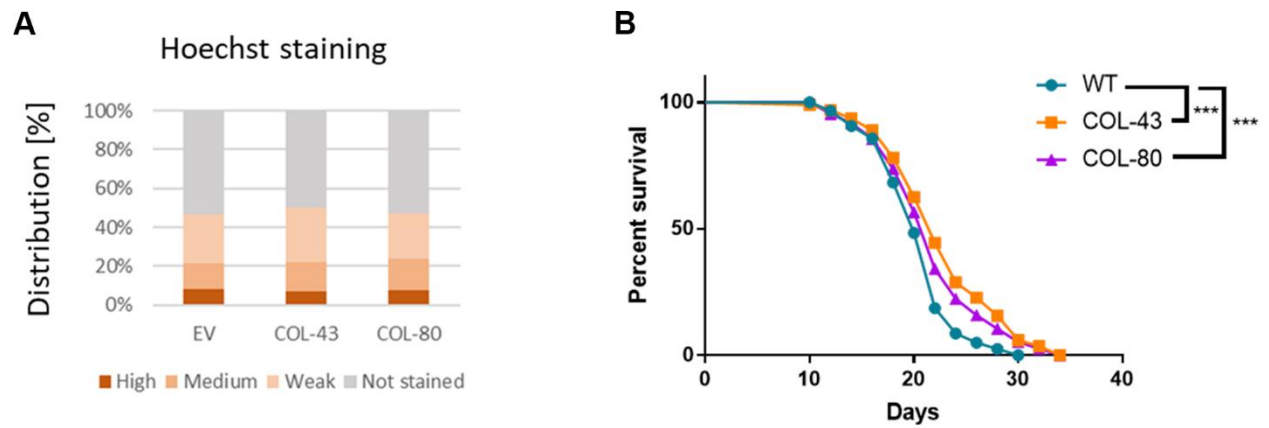

**Supplementary Figure 3. (A)** Collagen overexpression does not affect the Hoechst permeability through cuticle. Day-1 adult worms were incubated in  $1 \mu\text{g ml}^{-1}$  Hoechst 33342 for 15 min and washed with M9 buffer. Stained nuclei in the tail area were examined under microscope. Shown are % of animals with high (>10 nuclei stained), medium (6-10 nuclei stained), low (1-5 nuclei stained) or no Hoechst staining. **(B)** Collagen overexpression extends lifespan of Wild-type *C. elegans*. Age-matched worms expressing COL-43 or COL-80 and wild-type (WT) controls were cultured on NGM medium at  $20^\circ\text{C}$  from L1 to L4.  $50 \mu\text{M}$  FUDR (5-Fluoro-2'-deoxyuridine) was added to inhibit reproduction. Worms may be transferred to new plates as required. Experiments were carried out in 2 biological repeats and data were pooled and shown in Kaplan Meier survival curve. Comparison between control and overexpressors were statistically analyzed by log-rank test in Prism software.
